# Supplementary material
Source: PubMed Central journal article supplement (PMC4457341)
Supplement: NIHMS695040-supplement-supplement_1.pdf [file NIHMS695040-supplement-supplement_1.pdf]

Figure 4. Graph of individual data points for normal controls (open circles) and medicated schizophrenia cases (filled circles: SZ cases on medication). Spine density along the apical dendrite (stratum radiatum) is significantly higher at three locations: the point of peak spine density and 50  $\mu$ m distal and proximal to the peak. The number of thorny excrescences also shows a significant elevation in the SZ cohort. \* =  $p < 0.01$ ; \*\* =  $p < 0.005$ .

## TABLE LEGENDS

**Table 1 Supplement.** Human brain case characteristics are averaged across groups using case number (N), sex composition, age, postmortem interval (PMI), and RNA Integrity Number (RIN). Group average +/- standard error of the mean

Table 1. The concentrations of the hypothesized proteins, which were significantly increased for healthy controls in CA3 SZ tissue, were not different from each other in the SZ cases on and off medication. The primary comparisons were not significant in these contrasts with bonferroni correction. Group average +/- standard error of the mean.

Table 2. The CA1 concentrations of the three target proteins altered in CA3. In CA1 tissue, GluN2B-containing NMDA receptor, PSD95, or GAD67 were not altered in SZ, in either the whole cohort or in the off medication SZ cohort subgroup; primary comparisons were not significant with the bonferroni correction.

Table 3. Histological examination of spine density show significant increases in spines in SZ at all three locations examined on the CA3 apical dendrite in stratum radiatum. Thorny excrescences also are increased in number in SZ. .

## TABLES

Table 1 Supplement. Case cohort characteristics, including HC, SZ, and distinguish SZ on medication (N=11) and off-medication( N=10)

|                         | <b>N</b> | <b>Sex (F/M)</b> | <b>Age</b> | <b>SEM (±)</b> | <b>PMI</b> | <b>SEM (±)</b> | <b>RIN</b> | <b>SEM (±)</b> |
|-------------------------|----------|------------------|------------|----------------|------------|----------------|------------|----------------|
| <b>Healthy Controls</b> | 21       | 3F/18M           | 57.4       | 2.92           | 19.4       | 1.33           | 7.7        | 0.39           |
| <b>Schizophrenia</b>    | 21       | 9F/12M           | 52.8       | 2.79           | 17.7       | 1.81           | 7.0        | 0.44           |

## **Supplemental Material:**

### **Management of Hippocampal Dissection:**

The tissue was dissected according to a standard protocol which included removing the hippocampus whole bilaterally from the fresh brain, embedding it longitudinally into a mold and cutting blocks at 5 mm intervals. Alternate blocks were either frozen immediately in a mixture of dry ice and isopentane (1:1, v : v) or fixed in 4% paraformaldehyde and in Golgi stain until further use. Four samples, each 300 um thick, were cryostat sectioned from a frozen block from the anterior hippocampus using a Thermo Scientific Cryostat Microtome at -20°C, then stored at -80°C. Nissl staining of 14 mm sections adjacent to the samples was used to determine orientation. The 300 um sections were dissected by hand into samples enriched for the subfields CA1 and CA3 as previously described<sup>22</sup>. Frozen samples were pulverized in PBS buffer containing 1% triton, protease inhibitors and phosphatase inhibitors. Protein concentration of the homogenate was determined using the BCA assay (Pierce). A cohort of high tissue quality hippocampal cases with CA1 and CA3 enriched regions was created including schizophrenia (N=21) [including N=10 cases on antipsychotic medication at death (SZ-ON) and N=11 schizophrenia cases off antipsychotic medication at death (SZ-OFF)] and age, sex, race and PMI and RIN-matched healthy control (HC) cases (n=21) Table 1S<sup>21</sup>. Off medication at death was confirmed by the negative plasma antipsychotic drug levels at autopsy and confirmed by family history of no recent medication use or pharmacy records whenever available.

### **Blotting of tissue proteins:**

Primary antibodies were obtained as follows: GluN1 and GluN2B antibodies from R&D Systems; GAD67 antibody from Abcam; PSD95 antibody from Cell Signaling Technology; and GluN2A, p-CREB and B-tublin antibodies from Millipore. Western blot experiments were performed by the scientists blind to case diagnosis. 20ug of tissue protein was mixed with 2-mercaptoethnal and 5x loading buffer and resolved in duplicate on a 7.5 to 12% SDS-PAGE gel. Gels were transferred to nitrocellulose membrane, blocked for one hour at room temperature, then incubated overnight at 4° Celsius with GluN1 (1:1k), PSD95(1:5k), GluN2A(1:1k), GluN2B(1:1k), GAD67(1:5k), p-CREB (1:1k) or B-tublin (1:10K). After washing, blots were incubated with secondary antibody (1:10k, anti-mouse IgG for GluN1 and B-tublin, anti-rabbit IgG for PSD95, GluN2A, GluN2B, p-CREB and GAD67) for one hour. Immunoreactive proteins were detected via enhanced chemiluminescence using Fuji film. Images of immunoreactive bands were captured using Color Video Camera, and the intensities were analyzed by densitometry using Scion image software with the scientists blind to case diagnosis. The measurements of immunoreactivity for each protein of interest were normalized to B-tublin in each sample. All determinations were performed in duplicate and averaged for the final value; coefficient of variation, 0.05 for CA3 proteins.
